# Supplementary material for: Effects of residue substitutions on the cellular abundance of proteins
Source: eLife. 2026 May 28;13:RP103721. doi: 10.7554/eLife.103721 (PMC13218725; doi:10.7554/eLife.103721)
Supplement: Supplementary file 1. — Protein sequences are given by their UniProt identifiers and crystal structure input files (Carter et al., 2015; Kumar et al., 2015; Le Coq et al., 2008; Lee et al., 1999; Wester et al., 2004; Wu et al., 2007) by their PDB identifiers. We used the PDB file chains and residues noted in the last two columns. [file elife-103721-supp1.xlsx]

## Sheet: Sheet1
Protein name	Abbreviation	UniProt ID	PDB ID	PDB chain	Residues
Phosphatase and Tensin Homolog	PTEN	P60484-1	1d5r	A	1-403
Thiopurine S-methyltransferase	TPMT	P51580	2h11	A	1-245
Cytochrome P450 2C9	CYP2C9	P11712-1	1r9o	A	29-490
Nucleotide triphosphate diphosphatase	NUDT15	Q9NV35	5bon	A+B	1-164
Aspartoacylase	ASPA	P45381	2o53	A+B	1-313
E3 ubiquitin-protein ligase parkin	PRKN	O60260-1	5c1z	A	1-465
